# Supplementary material
Source: PubMed Central journal article supplement (PMC7018540)
Supplement: NIHMS1051680-supplement-Supp_info.pdf [file NIHMS1051680-supplement-Supp_info.pdf]

## Supplemental To: Prospective *CYP2C19*-Guided Voriconazole Prophylaxis in Neutropenic AML Patients

### Reduces the Incidence of Subtherapeutic Antifungal Plasma Concentrations

**Table S1. Characteristics of the entire patient cohort stratified by *CYP2C19* diplotypes (n=263)**

|                    | <i>CYP2C19</i> *17/*17<br>n=5 | <i>CYP2C19</i> *1/*17<br>n=74 | <i>CYP2C19</i> *1/*1<br>n=105 | <i>CYP2C19</i> *2/*17<br>n=23 | <i>CYP2C19</i> *1/*2<br>n=49 | <i>CYP2C19</i> *2/*2<br>n=7 | <i>p</i> |
|--------------------|-------------------------------|-------------------------------|-------------------------------|-------------------------------|------------------------------|-----------------------------|----------|
| <b>Age (years)</b> |                               |                               |                               |                               |                              |                             |          |
| Median             | 69                            | 67                            | 63                            | 68                            | 64                           | 52                          |          |
| Range              | 60-71                         | 24-85                         | 19-81                         | 31-79                         | 22-86                        | 33-67                       | 0.04     |
| <b>Sex</b>         |                               |                               |                               |                               |                              |                             |          |
| Female             | 0                             | 38                            | 57                            | 4                             | 21                           | 4                           |          |
| Male               | 5                             | 36                            | 48                            | 19                            | 28                           | 3                           | 0.004    |
| <b>Weight (kg)</b> |                               |                               |                               |                               |                              |                             |          |
| Median             | 93.8                          | 83.8                          | 81.4                          | 78.9                          | 76.4                         | 69.3                        |          |
| Range              | 65.8-106.8                    | 47.5-129.9                    | 38-165.8                      | 50.9-123.6                    | 48-112.8                     | 51.3-118.4                  | 0.36     |

Statistical analysis for continuous variables (i.e., age and weight) was performed by the Kruskal Wallis test, and for categorical variables (i.e., sex) the Fisher's exact test. *CYP2C19*\*17/\*17 and *CYP2C19*\*2/\*17 diplotype groups had a greater number of males than females. *CYP2C19*\*2/\*2 diplotype group had a younger median age when compared to the other *CYP2C19* diplotype groups. When stratifying patients by phenotype (i.e., ultrarapid metabolizers (*CYP2C19*\*17/\*17), rapid metabolizers (*CYP2C19*\*1/\*17), normal metabolizers (*CYP2C19*\*1/\*1), intermediate metabolizers (*CYP2C19*\*2/\*17, *CYP2C19*\*1/\*2), poor metabolizers (*CYP2C19*\*2/\*2)), only sex is significantly different (p=0.01) among the phenotypes. The differences in age and sex among the diplotype groups and sex among phenotype groups are not predicted to influence study outcomes.

**Table S2. Characteristics of the 202 patients receiving prophylactic voriconazole**

|                                                |                |
|------------------------------------------------|----------------|
| <b>Age</b>                                     |                |
| Median (years)                                 | 64             |
| Range (years)                                  | 19-85          |
| <b>Sex</b>                                     |                |
|                                                | <b>No. (%)</b> |
| Female                                         | 99 (49.0)      |
| Male                                           | 103 (51.0)     |
| <b>Weight</b>                                  |                |
| Median (kg)                                    | 80.7           |
| Range (kg)                                     | 42-165.8       |
| <b>Self-declared race</b>                      |                |
|                                                | <b>No. (%)</b> |
| Asian                                          | 7 (3.5)        |
| Black                                          | 11 (5.5)       |
| Other                                          | 12 (5.9)       |
| Unknown                                        | 19 (9.4)       |
| White                                          | 153 (75.7)     |
| <b>CYP2C19 diplotypes/phenotypes</b>           |                |
|                                                | <b>No. (%)</b> |
| <i>CYP2C19*17/*17</i> –ultrarapid metabolizer  | 4 (2.0)        |
| <i>CYP2C19*1/*17</i> –rapid metabolizer        | 58 (28.7)      |
| <i>CYP2C19*1/*1</i> –normal metabolizer        | 75 (37.1)      |
| <i>CYP2C19*2/*17</i> –intermediate metabolizer | 16 (7.9)       |
| <i>CYP2C19*1/*2</i> –intermediate metabolizer  | 42 (20.8)      |
| <i>CYP2C19*2/*2</i> –poor metabolizer          | 7 (3.5)        |

**Table S3. Characteristics of the 202 patients receiving prophylactic voriconazole stratified by CYP2C19 diplotypes**

|                    | <i>CYP2C19*17/*17</i><br>n=4 | <i>CYP2C19*1/*17</i><br>n=58 | <i>CYP2C19*1/*1</i><br>n=75 | <i>CYP2C19*2/*17</i><br>n=16 | <i>CYP2C19*1/*2</i><br>n=42 | <i>CYP2C19*2/*2</i><br>n=7 | <i>p</i> |
|--------------------|------------------------------|------------------------------|-----------------------------|------------------------------|-----------------------------|----------------------------|----------|
| <b>Age (years)</b> |                              |                              |                             |                              |                             |                            |          |
| Median             | 66.5                         | 66                           | 62                          | 67                           | 63.5                        | 52                         |          |
| Range              | 60-71                        | 24-85                        | 19-81                       | 31-79                        | 22-75                       | 33-67                      | 0.17     |
| <b>Sex</b>         |                              |                              |                             |                              |                             |                            |          |
| Female             | 0                            | 30                           | 43                          | 2                            | 20                          | 4                          |          |
| Male               | 4                            | 28                           | 32                          | 14                           | 22                          | 3                          | 0.007    |
| <b>Weight (kg)</b> |                              |                              |                             |                              |                             |                            |          |
| Median             | 89.1                         | 85.6                         | 81.4                        | 79.1                         | 76.8                        | 69.2                       |          |
| Range              | 65.5-106.8                   | 47.5-129.9                   | 42-165.8                    | 50.9-123.6                   | 52.6-112.8                  | 51.3-118.4                 | 0.34     |

Statistical analysis for continuous variables (i.e., age and weight) was performed by the Kruskal Wallis test, and for categorical variables (i.e., sex) the Fisher's exact test. *CYP2C19\*17/\*17* and *CYP2C19\*2/\*17* diplotype groups had a greater number of males than females. When stratifying patients by phenotype (i.e., ultrarapid metabolizers (*CYP2C19\*17/\*17*), rapid metabolizers (*CYP2C19\*1/\*17*), normal metabolizers (*CYP2C19\*1/\*1*), intermediate metabolizers (*CYP2C19\*2/\*17*, *CYP2C19\*1/\*2*), poor metabolizers (*CYP2C19\*2/\*2*)), there are no significant differences among the phenotypes. The differences in age among diplotype groups are not predicted to influence study outcomes.

**Table S4. Characteristics of the 70 patients with voriconazole plasma trough concentrations**

|                                                |                |
|------------------------------------------------|----------------|
| <b>Age</b>                                     |                |
| Median (years)                                 | 64.5           |
| Range (years)                                  | 24-79          |
| <b>Sex</b>                                     |                |
|                                                | <b>No. (%)</b> |
| Female                                         | 36 (51.4)      |
| Male                                           | 34 (48.6)      |
| <b>Weight</b>                                  |                |
| Median (kg)                                    | 79.3           |
| Range (kg)                                     | 42-127.4       |
| <b>Self-declared race</b>                      |                |
|                                                | <b>No. (%)</b> |
| Black                                          | 1 (1.4)        |
| Asian                                          | 4 (5.7)        |
| Other                                          | 4 (5.7)        |
| Unknown                                        | 4 (5.7)        |
| White                                          | 57 (81.4)      |
| <b>CYP2C19 diplotypes/phenotypes</b>           |                |
|                                                | <b>No. (%)</b> |
| <i>CYP2C19</i> *1/*17–rapid metabolizer        | 41 (58.6)      |
| <i>CYP2C19</i> *1/*1–normal metabolizer        | 13 (18.6)      |
| <i>CYP2C19</i> *2/*17–intermediate metabolizer | 4 (5.7)        |
| <i>CYP2C19</i> *1/*2–intermediate metabolizer  | 7 (10.0)       |
| <i>CYP2C19</i> *2/*2–poor metabolizer          | 5 (7.1)        |

**Table S5. Characteristics of the 70 patients with voriconazole plasma trough concentrations stratified by CYP2C19 diplotypes**

|                    | <i>CYP2C19</i> *17/*17<br>n=0 | <i>CYP2C19</i> *1/*17<br>n=41 | <i>CYP2C19</i> *1/*1<br>n=13 | <i>CYP2C19</i> *2/*17<br>n=4 | <i>CYP2C19</i> *1/*2<br>n=7 | <i>CYP2C19</i> *2/*2<br>n=5 | <i>p</i> |
|--------------------|-------------------------------|-------------------------------|------------------------------|------------------------------|-----------------------------|-----------------------------|----------|
| <b>Age (years)</b> |                               |                               |                              |                              |                             |                             |          |
| Median             | N/A                           | 65                            | 66                           | 71.5                         | 64                          | 52                          |          |
| Range              | N/A                           | 24-79                         | 50-75                        | 63-76                        | 24-69                       | 33-67                       | 0.1      |
| <b>Sex</b>         |                               |                               |                              |                              |                             |                             |          |
| Female             | N/A                           | 23                            | 6                            | 0                            | 3                           | 4                           |          |
| Male               | N/A                           | 18                            | 7                            | 4                            | 4                           | 1                           | 0.18     |
| <b>Weight (kg)</b> |                               |                               |                              |                              |                             |                             |          |
| Median             | N/A                           | 82.9                          | 75.9                         | 78.1                         | 71.2                        | 69.2                        |          |
| Range              | N/A                           | 47.5-127.4                    | 42-107.7                     | 66-103                       | 62.6-96.7                   | 51.3-118.4                  | 0.56     |

Statistical analysis for continuous variables (i.e., age and weight) was performed by the Kruskal Wallis test, and for categorical variables (i.e., sex) the Fisher's exact test. When stratifying patients by phenotype (i.e., rapid metabolizers (*CYP2C19*\*1/\*17), normal metabolizers (*CYP2C19*\*1/\*1), intermediate metabolizers (*CYP2C19*\*2/\*17, *CYP2C19*\*1/\*2), poor metabolizers (*CYP2C19*\*2/\*2)), there are no significant differences among the phenotypes.

**Table S6. Characteristics of the 176 patients dosed per *CYP2C19* recommendations**

| <b>Age</b>                                     |            |
|------------------------------------------------|------------|
| Median (years)                                 | 64         |
| Range (years)                                  | 19-81      |
| <b>Sex</b>                                     |            |
|                                                | No. (%)    |
| Female                                         | 83 (47.2)  |
| Male                                           | 93 (52.8)  |
| <b>Weight</b>                                  |            |
| Median (kg)                                    | 80.5       |
| Range (kg)                                     | 42-148.3   |
| <b>Self-declared race</b>                      |            |
|                                                | No. (%)    |
| Asian                                          | 6 (3.4)    |
| Black                                          | 8 (4.5)    |
| Other                                          | 9 (5.1)    |
| Unknown                                        | 14 (8.0)   |
| White                                          | 139 (79.0) |
| <b><i>CYP2C19</i> diplotypes/phenotypes</b>    |            |
|                                                | No. (%)    |
| <i>CYP2C19</i> *17/*17–ultrarapid metabolizer  | 3 (1.7)    |
| <i>CYP2C19</i> *1/*17–rapid metabolizer        | 46 (26.1)  |
| <i>CYP2C19</i> *1/*1–normal metabolizer        | 64 (36.4)  |
| <i>CYP2C19</i> *2/*17–intermediate metabolizer | 16 (9.1)   |
| <i>CYP2C19</i> *1/*2–intermediate metabolizer  | 40 (22.7)  |
| <i>CYP2C19</i> *2/*2–poor metabolizer          | 7 (4.0)    |

**Table S7. Characteristics of the 176 patients dosed per *CYP2C19* recommendations stratified by *CYP2C19* diplotypes**

|                    | <i>CYP2C19</i> *17/*17<br>n=3 | <i>CYP2C19</i> *1/*17<br>n=46 | <i>CYP2C19</i> *1/*1<br>n=64 | <i>CYP2C19</i> *2/*17<br>n=16 | <i>CYP2C19</i> *1/*2<br>n=40 | <i>CYP2C19</i> *2/*2<br>n=7 | <i>p</i> |
|--------------------|-------------------------------|-------------------------------|------------------------------|-------------------------------|------------------------------|-----------------------------|----------|
| <b>Age (years)</b> |                               |                               |                              |                               |                              |                             |          |
| Median             | 64                            | 66                            | 63                           | 68                            | 64                           | 52                          |          |
| Range              | 60-71                         | 31-78                         | 19-81                        | 31-79                         | 22-75                        | 33-67                       | 0.43     |
| <b>Sex</b>         |                               |                               |                              |                               |                              |                             |          |
| Female             | 0                             | 24                            | 34                           | 2                             | 19                           | 4                           |          |
| Male               | 3                             | 22                            | 30                           | 14                            | 21                           | 3                           | 0.03     |
| <b>Weight (kg)</b> |                               |                               |                              |                               |                              |                             |          |
| Median             | 93.8                          | 84.9                          | 82                           | 79.1                          | 76.8                         | 69.2                        |          |
| Range              | 65.8-106.8                    | 47.5-129.9                    | 42-148.3                     | 50.9-123.6                    | 52.6-112.8                   | 51.3-118.4                  | 0.33     |

Statistical analysis for continuous variables (i.e., age and weight) was performed by the Kruskal Wallis test, and for categorical variables (i.e., sex) the Fisher's exact test. *CYP2C19*\*17/\*17 and *CYP2C19*\*2/\*17 diplotype groups had a greater number of males than females. When stratifying patients by phenotype (i.e., ultrarapid metabolizers (*CYP2C19*\*17/\*17), rapid metabolizers (*CYP2C19*\*1/\*17), normal metabolizers (*CYP2C19*\*1/\*1), intermediate metabolizers (*CYP2C19*\*2/\*17, *CYP2C19*\*1/\*2), poor metabolizers (*CYP2C19*\*2/\*2)), there are no significant differences among the phenotypes. The differences in age among diplotype groups are not predicted to influence study outcomes.

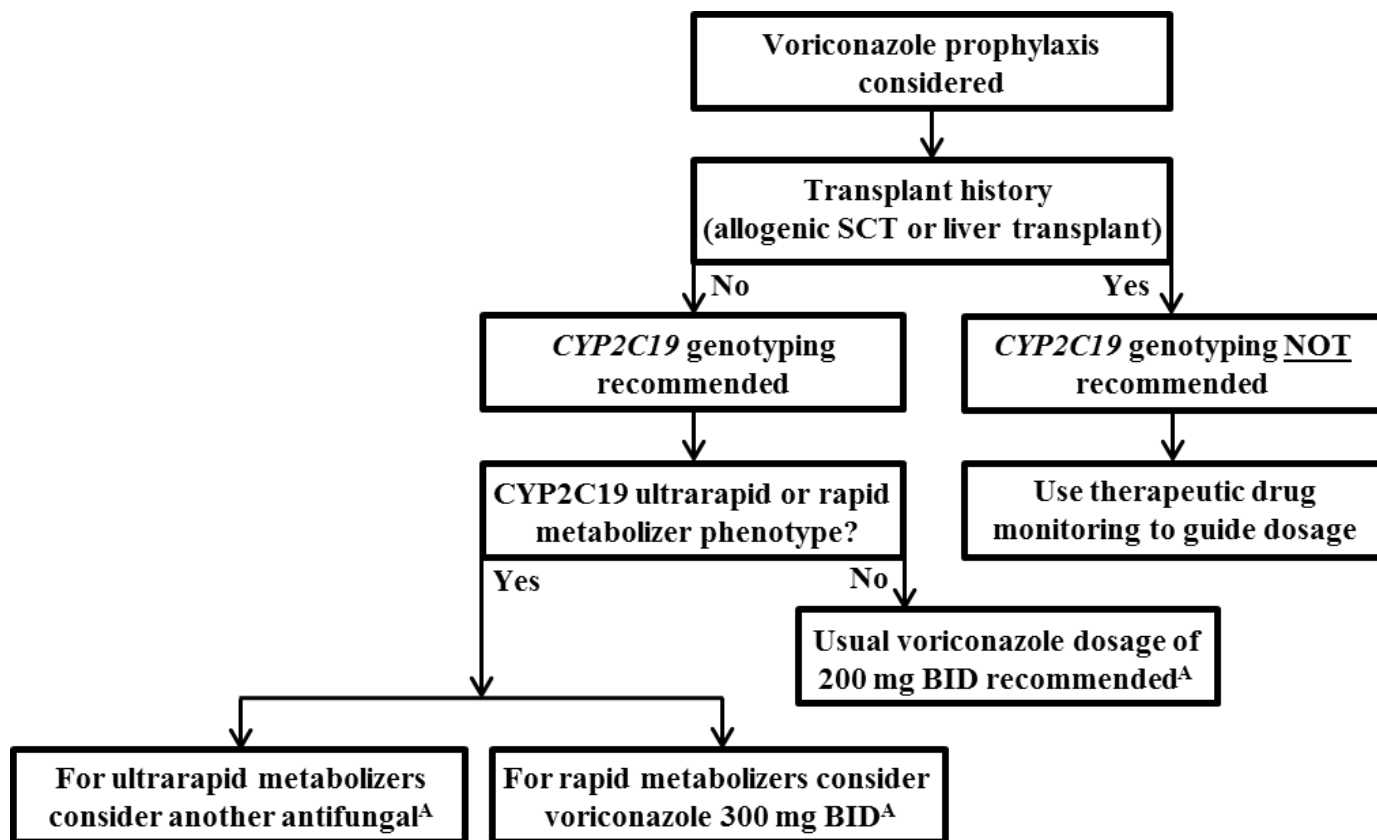

**Figure S1:** Schematic of clinical workflows for *CYP2C19* genotyping and voriconazole dosing. Alternative antifungal recommendations for *CYP2C19* ultrarapid metabolizers are based on formulary and Infectious Disease recommendations. For patients with a history of allogenic stem cell transplant, a pre-transplant germline DNA sample must be available for *CYP2C19* genotyping to be included in this quality improvement study. <sup>A</sup>Weight, concomitant drugs, and liver function may influence drug selection and dosage. SCT = stem cell transplant

A.

| Personalized Medicine Notes and Data |                               |
|--------------------------------------|-------------------------------|
| Personalized Medicine CYP2C19        | Personalized Medicine CYP2C19 |
| CYP2C19 Genotype Test Results        | CYP2C19 *1/*17                |
| CYP2C19 Phenotype Test Results       | (A) (c) Rapid Metabolizer     |

**CYP2C19 Genotype Consultation**

**CYP2C19 Genotype Results:** CYP2C19 \*1/\*17 ← **Discrete Phenotype Embedded in Note**

**CYP2C19 Phenotype Results:** Rapid Metabolizer

**PersMed CYP2C19 117:** This result signifies that this patient has one copy of a normal function allele (\*1) and one copy of an increased function allele (\*17). Based on the genotype result this patient is predicted to be a rapid metabolizer of CYP2C19 substrates. This patient may be at risk for an adverse or poor response to certain medications that are metabolized by CYP2C19. To avoid an untoward drug response, dose adjustments may be necessary for medications metabolized by CYP2C19. Drugs metabolized by CYP2C19 include, but are not limited to, certain tricyclic and selective serotonin reuptake inhibitor antidepressants, certain proton pump inhibitors, clopidogrel, and voriconazole.

Please contact the Personalized Medicine Clinical Service (personalizedmedconsult@moffitt.org, pager number: 256-5586) for more information about how CYP2C19 metabolic status influences drug selection and dosing.

**Figure S2:** A) Screenshot of *CYP2C19* results displayed in the EHR. *CYP2C19* results are entered into the EHR in a textual, non-discrete manner. B) Screenshot of a semi-automated Personalized Medicine *CYP2C19* interpretation note that is entered into the EHR for every *CYP2C19* result. A discrete phenotype is embedded in the note for the purpose of driving clinical decision support alerts.

A.

Details for voriconazole

Details | Order Comments | Diagnoses

Remaining Administrations: 56

\*Dose: 200 mg  
 \*Route: PO  
 Priority: Routine  
 PRN:  
 Freetext Rate:  
 Rate Unit:  
 Infuse over unit:  
 Stop date/time: 03/30/2018 2159 EDT  
 \*Pt Counseled about Visual SE, Hallucinations, and Pho... Yes No  
 Research account:  
 CYP2C19 Phenotype: Ultra-rapid Metabolizer

Drug Form: tab  
 \*Frequency: BID  
 \*Start date/time: 3/2/2018 22:00 EST  
 Duration:  
 Rate:  
 Infuse over:  
 Total volume:  
 \*Justification for Use: Antifungal PPx in leukemic p...  
 Soarian Check-in Date/Time: EST  
 CYP2C19 Genotype: \*17/\*17

B.

View

Related Results (7)

| Test Name                             | Value                   | Date/Time          |
|---------------------------------------|-------------------------|--------------------|
| <b>ALT (SGPT)</b>                     |                         |                    |
| ALT                                   | 182                     | 3/9/2018 2:29 EST  |
| ALT                                   | 63                      | 3/9/2018 1:13 EST  |
| ALT                                   | 115                     | 3/8/2018 5:04 EST  |
| <b>AST (SGOT)</b>                     |                         |                    |
| AST                                   | 109                     | 3/9/2018 2:29 EST  |
| AST                                   | 22                      | 3/9/2018 1:13 EST  |
| AST                                   | 27                      | 3/8/2018 5:04 EST  |
| <b>Alk. Phosphatase</b>               |                         |                    |
| Alk. Phosphatase                      | 69                      | 3/9/2018 2:29 EST  |
| Alk. Phosphatase                      | 79                      | 3/9/2018 1:13 EST  |
| Alk. Phosphatase                      | 89                      | 3/8/2018 5:04 EST  |
| <b>CYP2C19 Genotype Test Results</b>  |                         |                    |
| CYP2C19 Genotype                      | *17/*17                 | 3/2/2018 16:19 EST |
| <b>CYP2C19 Phenotype Test Results</b> |                         |                    |
| CYP2C19 Phenotype                     | Ultra-rapid Metabolizer | 3/2/2018 16:19 EST |
| <b>Direct Bilirubin</b>               |                         |                    |
| Direct Bilirubin                      | 0.4                     | 3/1/2018 16:24 EST |
| <b>Total Bilirubin</b>                |                         |                    |
| Total Bilirubin                       | 0.80                    | 3/9/2018 2:29 EST  |
| Total Bilirubin                       | 0.80                    | 3/9/2018 1:13 EST  |
| Total Bilirubin                       | 0.90                    | 3/8/2018 5:04 EST  |

**Figure S3:** A) Screenshot of the Drug Order Field for voriconazole. Passive CDS consisting of the *CYP2C19* genotype and predicted phenotype are placed in the Drug Order Field to remind clinicians of important results. B) Screenshot of the Related Results section of the Drug Order Field. *CYP2C19* results are also included in the Related Results section, which consists of laboratory test results that may influence voriconazole dosing.

**A.**

**HIGH RISK OF SUB-THERAPEUTIC VORICONAZOLE LEVELS**

HIGH RISK OF SUB-THERAPEUTIC VORICONAZOLE CONCENTRATION

Based on CYP2C19 genotype data, this patient is predicted to be an ultra-rapid metabolizer of voriconazole.

Standard voriconazole dosing is expected to result in sub-therapeutic concentrations which can lead to reduced antifungal activity. Consider prescribing another anti-fungal agent such as oral isavuconazonium. If an IV formulation is needed, consider IV isavuconazonium for a suspected fungal infection or IV micafungin for prophylaxis.

For more information about CYP2C19-voriconazole, please contact  
Antimicrobial Stewardship (pager: 256-5531)  
Or Personalized Medicine Clinical Service (pager: 256-5586)

**Alert Action**

Cancel voriconazole order, select alternative antifungal therapy  
 Continue placing voriconazole order

**Add Order for:**

Cresemba (isavuconazonium) PO Order Set  
 Cresemba (isavuconazonium) IV Order Set  
 micafungin -> DOSE: 100 mg. piggyback, IVPB, Q 24 hr

Alert History Reference OK

**B.**

**Consult Inpatient MD/Program**

Additional Info Comments **Details** History Validation Results Compliance History Plan History

**Details**

Priority: Routine

Requested Start Date/Time: 3/2/2018 10:16 EST

Consulting Med Service: Antimicrobial Stewardship

Reason for Consult: CYP2C19 Rapid Metabolizer

Provider Notified (Y/N): No

Stop Date/Time: 3/2/2018 10:16 EST

**Action Pane**

Complete Reason: [dropdown]

Next OK OK & Next

**Figure S4:** **A)** Screenshot of an interruptive, *CYP2C19*-voriconazole clinical decision support alert. Ordering voriconazole for a patient with a discrete *CYP2C19* ultrarapid metabolizer phenotype curated in a Personalized Medicine interpretation note triggers alert firing. Selecting ‘OK’ automatically cancels the voriconazole order and initiates a loading dose order set for isavuconazonium. An education document (**Figure S5**) is available by clicking the ‘reference’ icon. **B)** Screenshot of an automated consult to the Antimicrobial Stewardship service. To help prevent alert fatigue at the point-of-care, an automated consult to the antimicrobial stewardship program, instead of a pop-up alert, is triggered when voriconazole is ordered for a patient with a rapid metabolizer status. The antimicrobial stewardship consult prompts review of voriconazole dosing.



**Purpose of Document:** CYP2C19 metabolizes voriconazole to compounds with less antifungal activity. Those with CYP2C19 rapid or ultra-rapid metabolism are at risk of low voriconazole concentrations. CYP2C19 genotyping is offered at Moffitt Cancer Center (**test name CYP2C19 Genotype**) to help identify those predicted to be CYP2C19 ultra-rapid/rapid metabolizers. The purpose of this document is to provide guidance for CYP2C19 test ordering, result interpretation, and gene-based pharmacotherapy recommendations.

**CYP2C19–Voriconazole:** Genetic variations may influence the enzymatic activity of CYP2C19. **Table 1** provides possible CYP2C19 genotype results along with predicted phenotypes (enzyme activity). Consideration should be given to CYP2C19 genotyping to identify ultra-rapid or rapid metabolizers, who represent ~ 25% of the population. These individuals

are at risk of sub-therapeutic voriconazole concentrations which can result in reduced antifungal activity.<sup>1,2</sup> Therapeutic modifications such as selecting a different drug or dosage (**Table 1**) may help prevent progressive fungal infections in a cost-effective manner.<sup>3</sup> An algorithm is available for clinical decision making regarding CYP2C19-voriconazole (**Figure 1**).

**Voriconazole Therapeutic Drug Monitoring:** Voriconazole has a narrow therapeutic range of 1-5.5 mcg/mL.<sup>4,5</sup> Voriconazole trough concentrations should be obtained at steady-state (5-7 days after starting therapy). For those with a trough <1 mcg/mL, the voriconazole dosage should be increased. If the voriconazole dose is increased and trough concentrations continue to be <1 mcg/mL, another antifungal agent should be considered.

**CYP2C19 Based Pharmacotherapy Recommendations:** There is strong evidence suggesting that ultra-rapid metabolizers should avoid voriconazole and that rapid metabolizers should be administered higher doses.<sup>1-3</sup> **Table 1** summarizes the pharmacotherapy recommendations based on CYP2C19 metabolizer status.

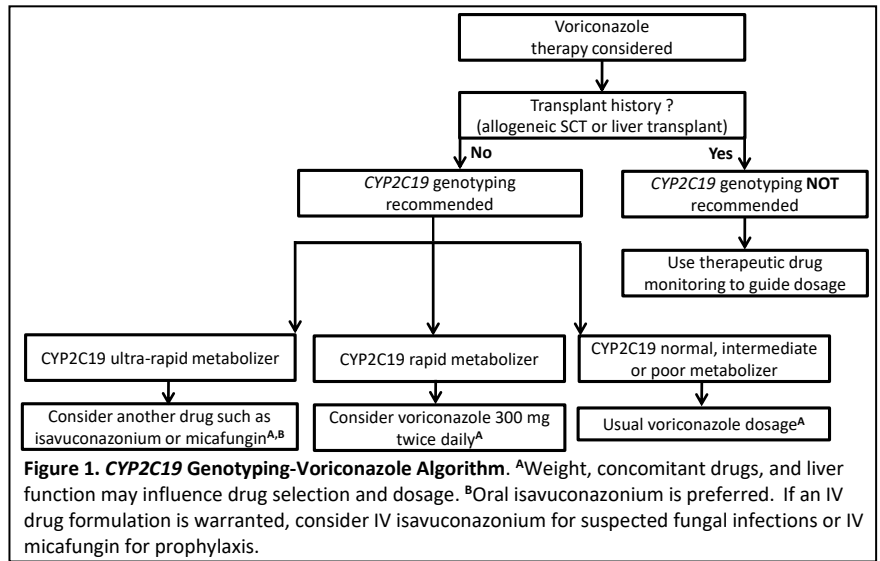

**Figure 1. CYP2C19 Genotyping-Voriconazole Algorithm.** <sup>A</sup>Weight, concomitant drugs, and liver function may influence drug selection and dosage. <sup>B</sup>Oral isavuconazonium is preferred. If an IV drug formulation is warranted, consider IV isavuconazonium for suspected fungal infections or IV micafungin for prophylaxis.

**Table 1. Voriconazole dosing recommendations based on CYP2C19 phenotype<sup>A</sup>**

| CYP2C19 result               | CYP2C19 phenotype        | Implications                                                  | Dosing recommendations                                                                                                                                                       |
|------------------------------|--------------------------|---------------------------------------------------------------|------------------------------------------------------------------------------------------------------------------------------------------------------------------------------|
| *17/*17                      | Ultra-rapid metabolizer  | Very high risk of sub-therapeutic voriconazole concentrations | Consider oral isavuconazonium. If an IV formulation is warranted, consider IV isavuconazonium for suspected fungal infections or IV micafungin for prophylaxis. <sup>A</sup> |
| *1/*17                       | Rapid metabolizer        | High risk of sub-therapeutic voriconazole concentrations      | Consider voriconazole 300 mg twice daily for prophylaxis or treatment. <sup>A,B</sup>                                                                                        |
| *1/*1                        | Normal metabolizer       | No influence on voriconazole plasma concentrations            | Consider voriconazole 200 mg twice daily for prophylaxis or 300 mg twice daily for treatment. <sup>A,B</sup>                                                                 |
| *1/*2, *1/*3, *2/*17, *3/*17 | Intermediate metabolizer | Risk of elevated voriconazole plasma concentrations           | Consider voriconazole 200 mg twice daily for prophylaxis or 300 mg twice daily for treatment. <sup>A,B</sup>                                                                 |
| *2/*2, *3/*3, *2/*3          | Poor metabolizer         | Risk of elevated voriconazole plasma concentrations           | Consider voriconazole 200 mg twice daily for prophylaxis or treatment. <sup>A,B</sup>                                                                                        |

<sup>A</sup>Weight, concomitant drugs, liver function, and prior voriconazole trough concentration may influence drug selection and dosage.

<sup>B</sup>Use therapeutic drug monitoring to guide dosage.

**OTHER CONSIDERATIONS:** For those individuals with a history of allogeneic stem cell transplant, CYP2C19 genetic test results may be representative of the donor genotype and not the host genotype. For those individuals with a history of liver transplant, CYP2C19 genetic test results may not be representative of donor liver metabolic capacity. CYP2C19 genotyping is not recommended for those with a history of allogeneic stem cell transplant or liver transplant. Instead, use voriconazole therapeutic drug monitoring to guide dosage.

CYP2C19 genotyping turnaround time is approximately 5 days. For questions regarding who should be considered for CYP2C19 genotyping or questions about drug therapy please contact the Personalized Medicine Clinical Service (pager 256-5586), the Antimicrobial Stewardship (256-5531) or a clinical pharmacist.

**REFERENCES:**

- Hicks et al. *Pharmacogenomics*. 15, 2014 PMID: 25084200
- Lamoureux et al. *Int J Antimicrob Agents*. 47, 2016 PMID: 26775563
- Mason et al. *J Antimicrob Chemother*. 70, 2015 PMID: 26233624
- Mitsani et al. *Antimicrob Agents Chemother*. 56, 2012 PMID:22330924
- Trifilio et al. *Bone Marrow Transplant*. 40, 2007 PMID: 17589527

**Figure S5:** CYP2C19-Voriconazole education document. Alternative antifungal recommendations based on Moffitt’s formulary and Infectious Disease recommendations.

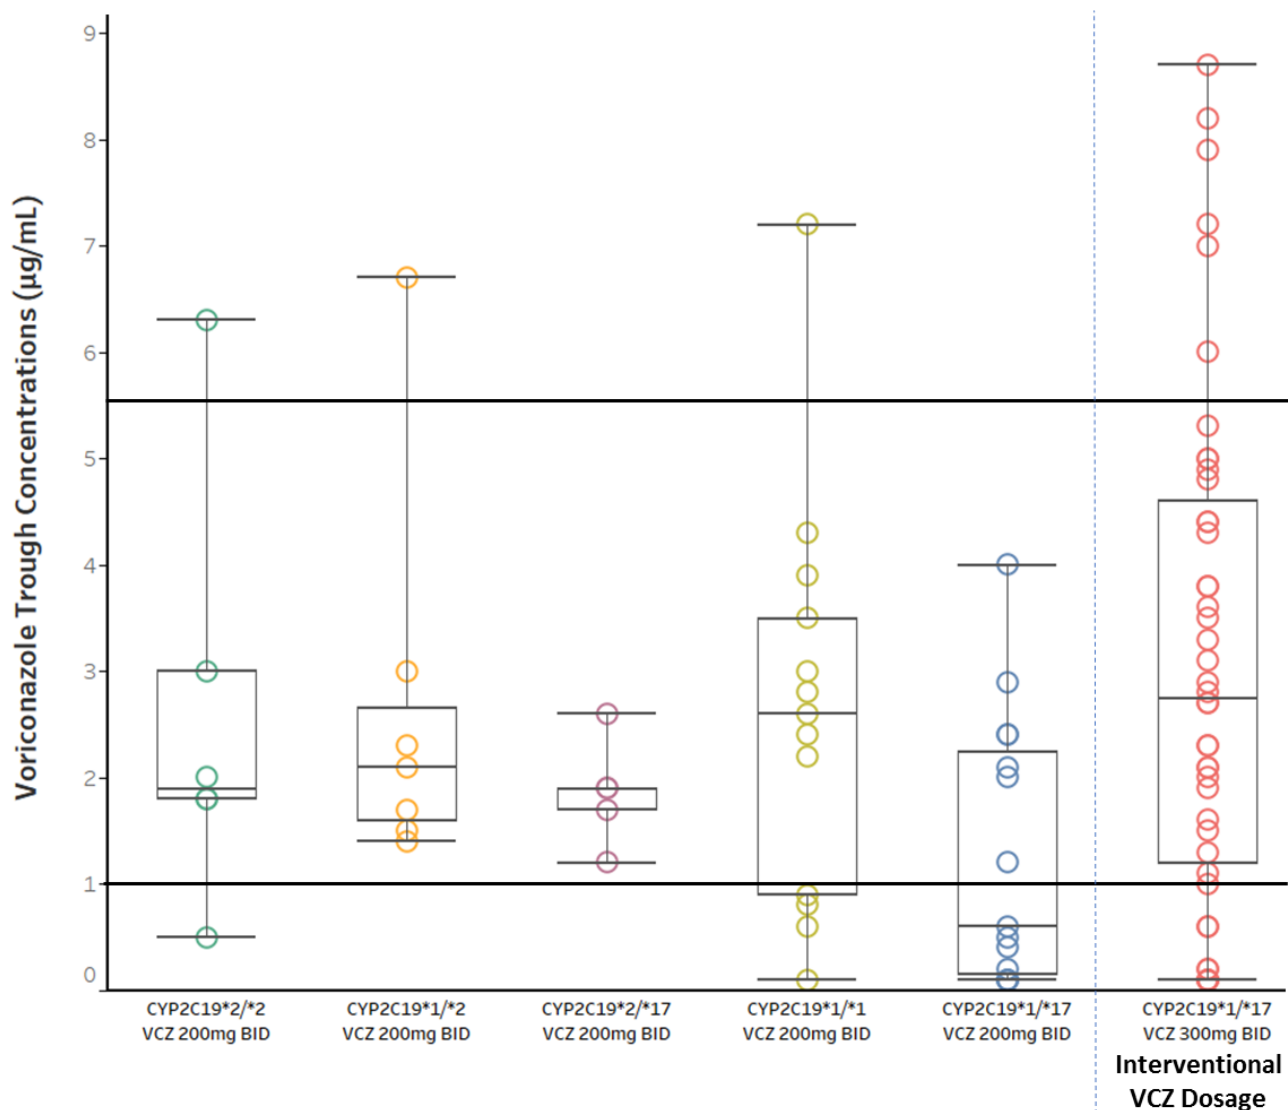

**Figure S6.** Voriconazole (VCZ) plasma trough concentrations were stratified by *CYP2C19* diplotype and dose. Total and median voriconazole trough concentrations are as follows: *CYP2C19\*1/\*17* receiving voriconazole 300 mg BID (n=44, median 2.7 µg/mL) or 200 mg BID (n=15, median 0.6 µg/mL); *CYP2C19\*1/\*1* (n=13, median 2.6 µg/mL), *CYP2C19\*2/\*17* (n=5, median 1.9 µg/mL), *CYP2C19\*1/\*2* (n=7, median 2.1 µg/mL), and *CYP2C19\*2/\*2* (n=6, median 1.9 µg/mL) receiving voriconazole 200 mg BID. The area between the solid black lines represents the goal trough concentration (1-5.5 µg/mL). The circles with a denser outline represent >1 trough concentration of the same value. To account for some patients having multiple voriconazole trough concentrations, statistical analysis was performed using a liner-mixed-effects model fitted to log-transformed voriconazole trough concentrations (Main Manuscript Figure 2). The box plot represents the median and interquartile range. BID = twice daily

Six unique patients who are *CYP2C19* rapid metabolizers received voriconazole 300 mg twice daily and had troughs ranging from 6-8.7 µg/mL. One patient experienced neurotoxicity, one patient had an increase in liver enzymes, and 4 patients did not have a toxicity necessitating voriconazole discontinuation.

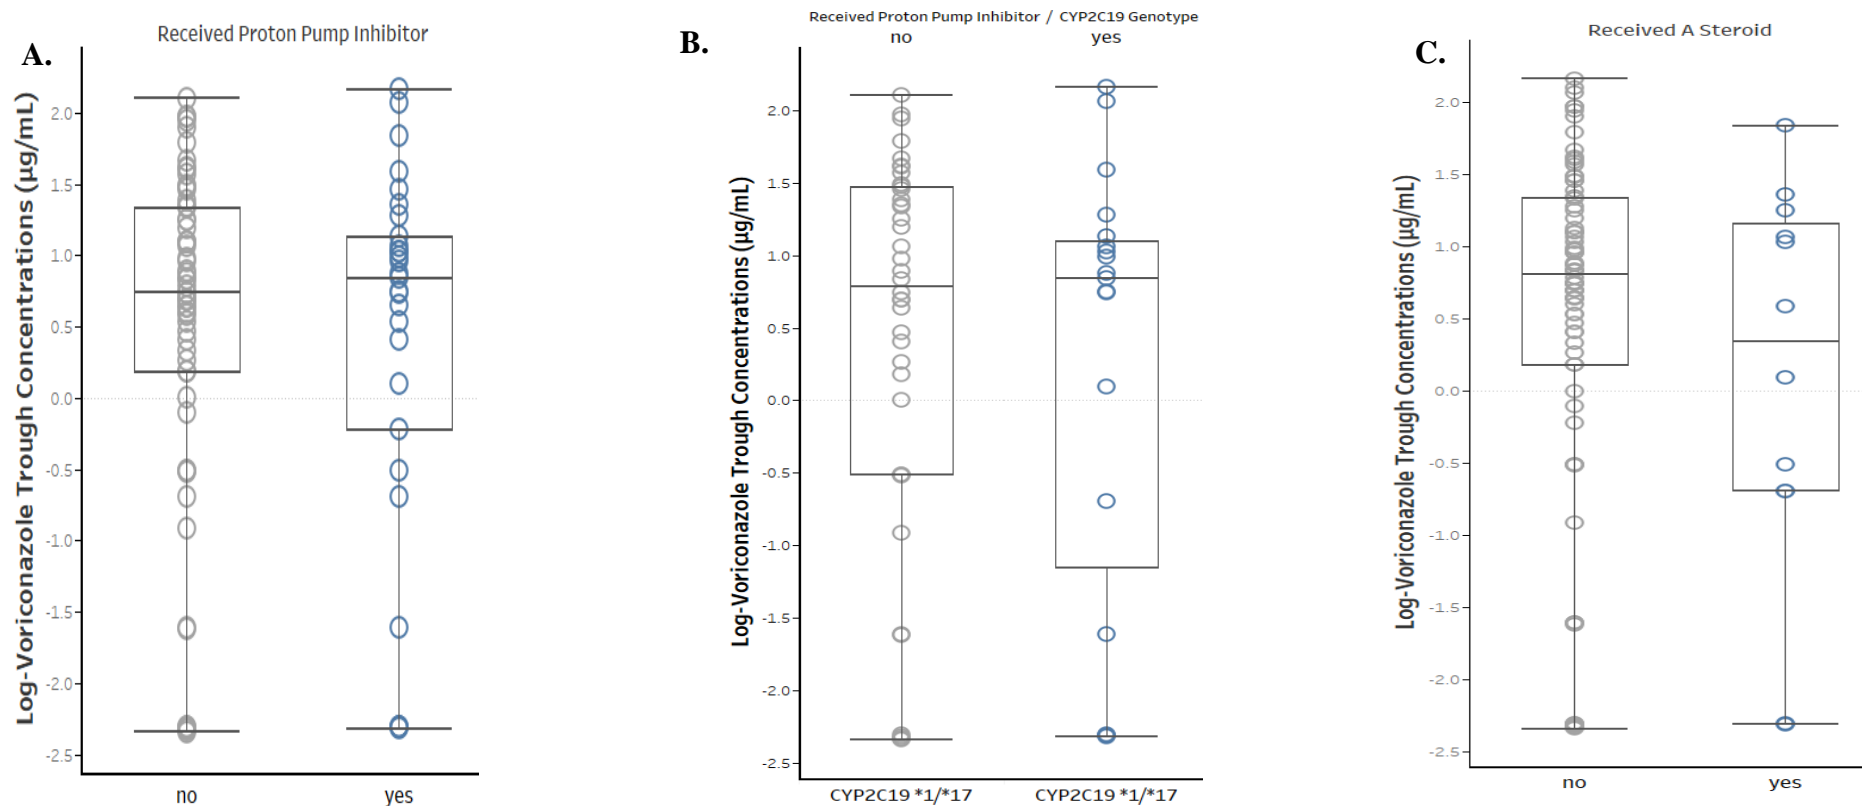

**Figure S7:** The influence of proton pump inhibitors and steroids on voriconazole plasma trough concentrations was investigated, as these drug classes are proposed to alter voriconazole metabolism. **A)** Voriconazole trough concentrations were similar between those who received a proton pump inhibitor (PPI) and those who did not receive a PPI ( $P=0.92$ ). Of the 70 patients with voriconazole concentrations, 21 patients (30%) were concomitantly receiving a proton pump inhibitor (esomeprazole=1, omeprazole=4, pantoprazole=16). The most commonly prescribed PPI was pantoprazole, which is thought to have less influence on voriconazole concentrations when compared to other PPIs such as omeprazole. **B)** Voriconazole trough concentrations were similar among CYP2C19 rapid metabolizers who did or did not receive a PPI ( $P=0.74$ ). **C)** Voriconazole trough concentrations were similar between those who did and did not receive a steroid ( $P=0.28$ ). Seven patients (10%) were concomitantly receiving a steroid (dexamethasone=2, fludrocortisone=2, methylprednisolone=1, hydrocortisone=2). Five of the patients on steroids were also taking a PPI.
